# Supplementary material
Source: MDPI journal article supplement (https://www.mdpi.com/2410-3888/8/5/233)
Supplement: s1 [file fishes-2354531-supplementary.pdf › fishes-2354531-supplementary.pdf]

**Table S1.** Mitogenomes used in phylogenetic analyzes.

| Family            | Scientific name                            | Acession number | Reference         | Length (bp)   |
|-------------------|--------------------------------------------|-----------------|-------------------|---------------|
| <b>Characidae</b> | <b><i>Hyphessobrycon heterorhabdus</i></b> | <b>OQ857750</b> | <b>This study</b> | <b>17,021</b> |
| Characidae        | <i>Pristella maxillaris</i>                | MW742325        | [23]              | 16,753        |
| Characidae        | <i>Hyphessobrycon amandae</i>              | MT484069        | [24]              | 16,701        |
| Characidae        | <i>Hemigrammus erythrozonus</i>            | MT484070        | [24]              | 16,701        |
| Characidae        | <i>Hasemanina nana</i>                     | AB861475        | [25]              | 16,581        |
| Lebiasinidae      | <i>Lebiasina astrigata</i>                 | MH921292        | [26]              | 16,899        |
| Characidae        | <i>Gephyrocharax atracaudatus</i>          | MT484070        | [27]              | 17,049        |
| Characidae        | <i>Hyphessobrycon roseus</i>               | MW315749        | [28]              | 17,046        |
| Characidae        | <i>Moenkhausia costae</i>                  | MW366831        | [29]              | 15,811        |
| Characidae        | <i>Hyphessobrycon pulchripinnis</i>        | MW315750        | [28]              | 17,020        |
| Characidae        | <i>Hyphessobrycon sweglesi</i>             | MW315751        | [28]              | 16,080        |
| Characidae        | <i>Hyphessobrycon megalopterus</i>         | MT185596        | [30]              | 16,773        |
| Characidae        | <i>Hyphessobrycon socolofi</i>             | MW742323        | [10]              | 17,132        |
| Characidae        | <i>Hemigrammus bleheri</i>                 | LC074360        | [31]              | 17,021        |
| Characidae        | <i>Paracheirodon axelrodi</i>              | AB898197        | [32]              | 17,100        |
| Characidae        | <i>Paracheirodon innesi</i>                | KT783482        | [33]              | 16,962        |
| Characidae        | <i>Psalidodon rivularis</i>                | MT428070        | [34]              | 16,812        |
| Characidae        | <i>Psalidodon fasciatus</i>                | BK013061        | [34]              | 16,626        |
| Characidae        | <i>Hyphessobrycon anisitsi</i>             | MW768878        | [10]              | 16,920        |
| Characidae        | <i>Oligosarcus argenteus</i>               | MF805814        | Unpublished       | 16,711        |
| Characidae        | <i>Astyanax aeneus</i>                     | BK013055        | [34]              | 16,769        |
| Characidae        | <i>Astyanax mexicanus</i>                  | AP011982        | [34]              | 16,768        |
| Characidae        | <i>Astyanax lacustris</i>                  | MT428067        | [34]              | 16,763        |
| Characidae        | <i>Astyanax altiparanae</i>                | MT428072        | [34]              | 16,730        |
| Characidae        | <i>Grundulus bogotensis</i>                | KM677190        | [35]              | 17,123        |
| Characidae        | <i>Hyphessobrycon amapaensis</i>           | MW742322        | [10]              | 16,920        |

|            |                                      |          |             |        |
|------------|--------------------------------------|----------|-------------|--------|
| Characidae | <i>Hemigrammus armstrongi</i>        | MW742324 | [10]        | 18,141 |
| Characidae | <i>Hyphessobrycon hebertaxelrodi</i> | MT769327 | [36]        | 17,417 |
| Characidae | <i>Nematobrycon palmeri</i>          | MN861079 | [37]        | 17,340 |
| Characidae | <i>Hyphessobrycon elachys</i>        | MW315747 | [28]        | 17,224 |
| Characidae | <i>Inpaichthys kerri</i>             | MW342758 | Unpublished | 17,032 |
| Characidae | <i>Hyphessobrycon flammeus</i>       | MW315748 | [28]        | 16,008 |
| Characidae | <i>Hemigrammus ocellifer</i>         | MW768877 | [10]        | 18,141 |
| Characidae | <i>Thayeria boehlkei</i>             | MW366638 | Unpublished | 16,624 |
| Characidae | <i>Moenkhausia sanctafilomenae</i>   | MW407181 | [29]        | 18,435 |

---
